# Supplementary material for: Population influences desiccation tolerance in an invasive aquatic snail, Potamopyrgus antipodarum (Tateidae, Mollusca)
Source: PeerJ. 2023 Jul 13;11:e15732. doi: 10.7717/peerj.15732 (PMC10350299; doi:10.7717/peerj.15732)
Supplement: Supplemental Information 1 [file peerj-11-15732-s001.xlsx]

## Sheet: Title Page
Raw data from Levri et al. experiments 1, 2, and 3.

## Sheet: Exp 1 
	After 24 hours
Clone		US1-PA			US2-O1			US1-WY
Replicate	1	2	3	1	2	3	1	2	3
Time (hours of dessication)	snails alive out of 10			snails alive out of 9			snails alive out of 10
0	10	10	10	9	9	9	10	10	10
9	10	10	10	9	9	9	10	10	10
18	2	3	2	5	2	5	8	7	7
24	1	1	0	1	1	0	3	3	1
36	0	0	0	0	0	1	0	0	0
48	0	0	0	0	0	0	0	0	0
	After one week
Clone		PA			Ontario			US1
Replicate	1	2	3	1	2	3	1	2	3
Time (hours of dessication)	snails alive out of 10			snails alive out of 9			snails alive out of 10
0	10	10	10	9	9	9	10	9	10		Ex
9	9	10	10	9	9	9	10	10	10
18	2	3	2	4	2	5	6	6	7
24	1	1	0	1	1	0	3	3	1
36	0	0	0	0	0	1	0	0	0
48	0	0	0	0	0	0	0	0	0
	After 24 hours
Clone		PA			Ontario			US1
Replicate	1	2	3	1	2	3	1	2	3
Time (hours of dessication)	% snails alive			% snails alive			% snails alive
0	1	1	1	1	1	1	1	1	1
9	1	1	1	1	1	1	1	1	1
18	0.2	0.3	0.2	0.555556	0.222222	0.555556	0.8	0.7	0.7
24	0.1	0.1	0	0.111111	0.111111	0	0.3	0.3	0.1
36	0	0	0	0	0	0.111111	0	0	0
48	0	0	0	0	0	0	0	0	0
	After one week
Clone		PA			Ontario			US1
Replicate	1	2	3	1	2	3	1	2	3
Time (hours of dessication)	% snails alive			% snails alive			% snails alive
0	1	1	1	1	1	1	1	0.9	1
9	0.9	1	1	1	1	1	1	1	1
18	0.2	0.3	0.3	0.444444	0.222222	0.555556	0.6	0.6	0.7
24	0.1	0.1	0.1	0.111111	0.111111	0	0.3	0.3	0.1
36	0	0	0	0	0	0.111111	0	0	0
48	0	0	0	0	0	0	0	0	0

## Sheet: Exp 2
	effect of snail size on survival due to desiccation
	Size Class	2			3			4
Replicate	1	2	3	1	2	3	1	2	3
Time	number alive out of 10
0	10	10	10	10	10	10	10	10	10
1	10	10	10	10	10	10	10	10	10
3	8	10	9	10	10	9	9	10	10
6	6	5	7	9	10	9	9	8	10
12	0	0	0	0	1	0	5	5	6
24	0	0	0	0	0	0	1	0	0
36	0	0	0	0	0	0	0	0	0
48	0	0	0	0	0	0	0	0	0

## Sheet: Exp 3
	population (1=PA, 2=NJ, 3=Syr, 4=MD)					temp (7, 17, 27)		number surviving out of 10
	7°C						17°C						27°C
Days	PA	NJ	Syr	MD		Days	PA	NJ	Syr	MD		Days	PA	NJ	Syr	MD
0	10	10	10	10		0		10	10	10		0	10	10	10	10
	10	10	10	10			10	10	10	10			10	10	10	10
	10	10	10	10			10	10	10	10			10	10	10	10
25	10	10	10	10		10	10	10	10	10		10	9	10	10	10
	10	10	10	10			10	10	10	10				10	9	10
	10	10	10	10			10	10	9	10			8	10	10	10
40	9	10	10	8		21	9	10	10	10		16			8	10
	10	10	10	10			10	10	10	10			0		3	8
	10	10	10	9			10	10	10	10			0	9	6	7
45	10	10	10	10		30	10	10	10	10		22		9	4
	10	10	9	10			10	10	10	10			0	8		2
	10	10	10	10			10	10	10	10			0	4		1
50	10	10	9	10		40	9	10	10	10		27			0
	10	10	10	10			9		10	10				1		0
	8	10	10	10			10	10	10	10			0	0		0
56	10	10	10	10		50	8	10	7			30	0	0	0	0	(They all showed signs of mold @ varying degrees on/after this day)
	10	10	10	10			10	10	7				0	0	0	0
	10	10	10	10				10		10			0	0	0	0
60		10	10	10		60	10	10	10	10		36	0	0	0	0
	10	10	10	10			9	10	3	10			0	0	0	0
		10	10	10			10	9		10			0	0	0	0
	US1-PA	US1-NJ	US2-Syr	US1-MD			US1-PA	US1-NJ	US2-Syr	US1-MD			US1-PA	US1-NJ	US2-Syr	US1-MD
0	10	10	10	10		0	10	10	10	10		0	10	10	10	10
25	10	10	10	10		10	10	10	9.66667	10		10	8.5	10	9.66667	10
40	9.66667	10	10	9		21	9.66667	10	10	10		16	0	9	5.66667	8.33333
45	10	10	9.66667	10		30	10	10	10	10		22	0	7	4	1.5
50	9.33333	10	9.66667	10		40	9.33333	10	10	10		27	0	0.5	0	0
56	10	10	10	10		50	9	10	7	10		30	0	0	0	0
60	10	10	10	10		60	9.66667	9.66667	6.5	10		36	0	0	0	0
	US1-PA	US1-NJ	US2-Syr	US1-MD			US1-PA	US1-NJ	US2-Syr	US1-MD			US1-PA	US1-NJ	US2-Syr	US1-MD
0	0	0	0	0		0	0	0	0	0		0	0	0	0	0
25	0	0	0	0		10	0	0	0.333333	0		10	0.5	0	0.333333	0
40	0.333333	0	0	0.57735		21	0.333333	0	0	0		16	0	#DIV/0!	1.45297	0.881917
45	0	0	0.333333	0		30	0	0	0	0		22	0	1.52753	#DIV/0!	0.5
50	0.666667	0	0.333333	0		40	0.333333	0	0	0		27	#DIV/0!	0.5	#DIV/0!	0
56	0	0	0	0		50	1	0	0	#DIV/0!		30	0	0	0	0
60	#DIV/0!	0	0	0		60	0.333333	0.333333	3.5	0		36	0	0	0	0
